# Supplementary material for: An electrochemical method to enhance the performance of metal oxides for photoelectrochemical water oxidation
Source: Royal Society of Chemistry journal article supplement (doi:10.1039/c5ta10477g), 2016-01-01
Supplement: c5ta10477g1.pdf [file c5ta10477g1.pdf]

# An Electrochemical Method to Enhance the Performance of Metal Oxides for Photoelectrochemical Water Oxidation

*Gongming Wang,<sup>a,#</sup> Yi Yang,<sup>a,#</sup> Yichuan Ling,<sup>a</sup> Hanyu Wang,<sup>a</sup> Xihong Lu,<sup>b</sup> Ying-Chih Pu,<sup>a</sup>*

*Jin Z. Zhang,<sup>a</sup> Yexiang Tong<sup>b</sup> and Yat Li<sup>\*,a</sup>*

<sup>a</sup> Department of Chemistry and Biochemistry, University of California, Santa Cruz,  
California 95064, United States

<sup>b</sup> KLGHEI of Environment and Energy Chemistry, MOE of the Key Laboratory of  
Bioinorganic and Synthetic Chemistry, School of Chemistry and Chemical Engineering,  
Sun Yat-Sen University, Guangzhou 510275, People's Republic of China

\*Corresponding author: [yatli@ucsc.edu](mailto:yatli@ucsc.edu)

# These authors contribute equally to this work.

## Experimental Section

**Synthesis of Rutile TiO<sub>2</sub> nanowires:** Rutile TiO<sub>2</sub> nanowire arrays were grown on a fluorine-doped tin oxide (FTO) glass substrate using a reported hydrothermal method.<sup>1</sup> 0.5 mL titanium n-butoxide was mixed with 15 ml of concentrated hydrochloric acid and 15 ml deionized (DI) water in a 50 ml beaker. After the solution became clear, the solution mixture were transferred to a Teflon-lined stainless steel autoclave (40 ml volume), where the FTO substrate was submerged in the solution with conducting side facing down. The sealed autoclave was kept at 150 °C for 5 hours, and then cooled down to room temperature. When taking out the FTO glass, a white film was uniformly coated on the FTO glass. The sample was finally washed with deionized water. Before TiO<sub>2</sub> was used for PEC studies, the TiO<sub>2</sub> film was annealed at 550 °C in air for 3 hours.

**Synthesis of WO<sub>3</sub> nanoblocks:** WO<sub>3</sub> nanoblocks were grown on a FTO glass substrate using a modified seed mediated solvothermal method.<sup>2</sup> The WO<sub>3</sub> seed solution was prepared as follows: 0.5 mmol WCl<sub>6</sub> was dissolved in 20 ml ethanol solution; the dissolved WCl<sub>6</sub> was quickly hydrolyzed by water moisture and produced blue precipitates. 30% H<sub>2</sub>O<sub>2</sub> solution was added into the blue precipitate-containing solution with stirring until the solution became clear. This WO<sub>3</sub> seed solution was dropped onto a piece of clean FTO glass. The excess solution was blow away by compressed air after 30 s. The FTO substrate was then annealed at 350 °C on a hot plate in air for 10 min. Repeat this deposition-annealing process for two or three times to get a uniform WO<sub>3</sub> seed layer on FTO substrate. Meanwhile, 0.2 g Na<sub>2</sub>WO<sub>4</sub> was dissolved in 25 ml mixture of ethylene glycol and water (volume ratio: 1:5) and the pH of the solution was adjusted to 2 by

adding hydrochloric acid. The prepared solution was transferred to a 30 ml volume Teflon-lined stainless steel autoclave. The  $\text{WO}_3$  seeded FTO substrate was placed into the Teflon-lined stainless steel autoclave with the seeded side facing down. The sealed autoclaves was heated in an electric oven at  $150\text{ }^\circ\text{C}$  for 5 hours, and then cooled down to room temperature naturally. The seeded FTO substrate was coated with a uniform blue film. After washed with ethanol and water, the film was calcined in the air at  $500\text{ }^\circ\text{C}$  for 2 hours.

**Synthesis of anatase  $\text{TiO}_2$  nanowires:** Anatase  $\text{TiO}_2$  nanowires were prepared on a titanium foil by using a previously reported hydrothermal method.<sup>3</sup> A clean Ti foil was placed in a Teflon-lined stainless-steel autoclave filled with an aqueous 1 M NaOH solution. The sealed autoclave was kept at  $180\text{ }^\circ\text{C}$  for 7 h. After the autoclave cooled to room temperature, the Ti foil was taken out and washed with DI water. The Ti foil was covered with nanowires and was immersed in an aqueous 1 M HCl solution for 10 min, rinsed with DI water, and air-dried. Finally, the Ti foil with nanowires was annealed in air at  $500\text{ }^\circ\text{C}$  for 3 h.

**Synthesis of  $\text{BiVO}_4$  nanoparticle film:** 1 mmol  $\text{NH}_4\text{VO}_4$ , 1 mmol  $\text{BiVO}_4$  and 2.5 mL concentrated  $\text{HNO}_3$  was mixed together in 50 ml deionized water. Ammonium hydroxide was used to neutralize the mixed solution, until no precipitate was produced with a pH around 9. Then, the precipitate was centrifuged out. The as prepared bright yellow precipitate was dispersed in 30 ml ethanol solution with addition of 0.2 g polyvinylpyrrolidone to increase viscosity for spin coating precursor. A piece of FTO

glass was cleaned with ethanol, acetone and water respectively. 0.2 ml precursor solution was dropped on the FTO glass, wait 30 seconds and then spin coating at 1500 r/min. the deposited FTO glass was annealed at 400 °C for 15 min to remove organic binder. Then repeat this process for 6 times and finally the obtained unformed film was air annealed at 550 °C for 2 h.

**Synthesis of ZnO nanowires:** ZnO nanowire arrays on FTO glass was synthesized by a modified seed mediated synthesis.<sup>4</sup> The seed coating was achieved by annealing the zinc acetate ethanol solution film on FTO glass at 350 °C for 30 min. This coating step was repeated three times. The seed coated FTO glass was placed into a Telfon-lined stainless steel autoclave with seeded side facing down, filled with 20 ml 0.05 M zinc nitrate and 0.05 M hexamethylenetetramine aqueous solution. The sealed autoclave was heated in an electric oven at 90 °C for 6 hours.

**Material characterization:** Scanning electron microscopy (SEM) images were collected with a field-emission SEM (Hitachi S-4800 II). X-ray diffraction (XRD) spectra were collected with a Rigaku Americas Miniflex Plus powder diffractometer. Diffraction spectra were recorded from a  $2\theta$  angle of 20 to 80 degree with a step size of 0.04 degree at a rate of 1 degree/min. X-ray Photoelectron Spectroscopy (XPS) was performed on a RBD upgraded PHI-5000C ESCA system (Perkin-Elmer) using Al-monochromatic X-ray at a power of 25 W with an X-ray-beam diameter of 10 mm, and a pass energy of 29.35 eV. The pressure of analyzer chamber was maintained below  $5 \times 10^{-8}$  Pa during the measurement. The binding energy was calibrated using the C 1s photoelectron peak at

284.6 eV as the reference. UV-vis diffusive reflectance measurement was conducted on Shimadzu UV-3101 PC UV-vis-NIR scanning spectrophotometer equipped with an integrating sphere attachment.

**Electrochemical treatment:** Electrochemical treatment was conducted on a CHI 660D electrochemical workstation. For TiO<sub>2</sub> nanowire arrays (rutile and anatase), a potential of -1.8 V vs. Ag/AgCl was applied in a 1 M NaOH aqueous solution for 10 s. For WO<sub>3</sub> nanoblocks, a potential of -0.8 V vs. Ag/AgCl was applied in a 1 M H<sub>2</sub>SO<sub>4</sub> aqueous solution for 3 s and the color of WO<sub>3</sub> was quickly converted from light yellow to blue. Then the film was annealed on a hot plate for another 5 min at 300 °C. For BiVO<sub>4</sub> nanoparticle film, a potential of -0.8 V vs. Ag/AgCl was applied in a 0.5 M Na<sub>2</sub>SO<sub>4</sub> aqueous solution for 30 s. For ZnO nanowire arrays, a potential of -1.2 V vs. Ag/AgCl was applied for 30 s in the neutral Na<sub>2</sub>SO<sub>4</sub> electrolyte solution. Mott-Schottky measurements of WO<sub>3</sub> were conducted on electrochemical workstation (CHI-660D) with 5 mV perturbation at a frequency of 10000 Hz in in the neutral Na<sub>2</sub>SO<sub>4</sub> electrolyte solution. The donor density was derived from the Mott-Schottky equation,

$$N_d = (2/e_0\epsilon\epsilon_0)[d(1/C^2)/dV]^{-1},$$

where  $e_0$  is the electron charge,  $\epsilon$  the dielectric constant of WO<sub>3</sub> ( $\epsilon=20$ ),  $\epsilon_0$  the permittivity of vacuum,  $N_d$  the donor density, and  $V$  the applied bias at the electrode. The equation was used to calculate is re-oxidation time based on enhanced photocurrent:

$$T_{\text{re-oxidation}} = \frac{\int_0^3 I(t)dt}{I_{\text{enhanced photocurrent}}},$$

where  $T_{\text{re-oxidation}}$  is the re-oxidation time,  $I(t)$  is the electrochemical reduction  $I-t$  curve

and  $I_{\text{enhanced photocurrent}}$  is the enhanced photocurrent at specific potentials.

**Photoelectrochemical measurements:** Metal oxide nanostructures were fabricated into photoanodes by soldering a copper wire onto a bare part of the FTO (Ti foil) substrate. The substrate edges and the metal contact region were sealed with insulating epoxy resin. The working electrode area is in the range of 0.15-0.2 cm<sup>2</sup>. 1 M NaOH aqueous solution (pH = 13.6) was used as a PEC electrolyte for Rutile and Anatase TiO<sub>2</sub> nanowires. 0.5 M Na<sub>2</sub>SO<sub>4</sub> aqueous solution (pH=6.8) was used as electrolyte for WO<sub>3</sub> and BiVO<sub>4</sub>. Linear sweeps, *I-t* scans and electrochemical impedance spectra were collected by a CHI 660D electrochemical station, with Ag/AgCl as reference and Pt wire as counter electrode, under simulated sunlight with a 150 W xenon lamp (Newport 6255) coupled with an AM 1.5 global filter (Newport 81094). Incident-photon-to-current-conversion-efficiencies (IPCE) were collected in the same electrolyte used for linear sweeps and *I-t* measurements by CHI 660D electrochemical station with a solar simulator (Newport 69920, 1000 W xenon lamp), coupled with an infrared water filter (Oriol 6127) and aligned monochromator (Oriol Cornerstone 130 1/8 m). Charge injection efficiency is estimated by measuring the photocurrent density in 0.5 M Na<sub>2</sub>SO<sub>4</sub> solution with/without H<sub>2</sub>O<sub>2</sub>. Charge separation efficiency is measured the photocurrent densities under 370 nm light illumination in 0.5 M Na<sub>2</sub>SO<sub>4</sub> solution with H<sub>2</sub>O<sub>2</sub>. The enhanced factors on charge separation efficiency and injection efficiency were calculated by the equations:

$$\text{Enhanced factor (charge separation)} = \frac{\text{Charge separation efficiency}_{\text{WO}_3-x}}{\text{Charge separation efficiency}_{\text{WO}_3}}$$

$$\text{Enhanced factor (charge injection)} = \frac{\text{Charge injection efficiency}_{\text{WO}_{3-x}}}{\text{Charge injection efficiency}_{\text{WO}_3}}$$

## Supplementary Figures

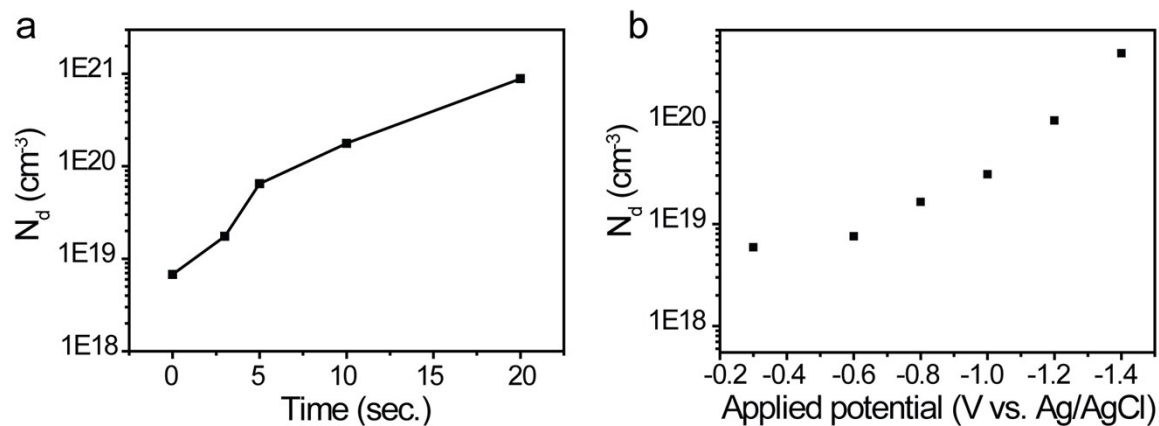

**Figure S1.** (a) A plot of donor density of  $\text{WO}_3$  as a function of electrochemical reduction time at the potential of  $-0.8\text{V}$  vs.  $\text{Ag}/\text{AgCl}$ . (b) A plot of donor density of  $\text{WO}_3$  electrochemically reduced for 3s as a function of applied potential.

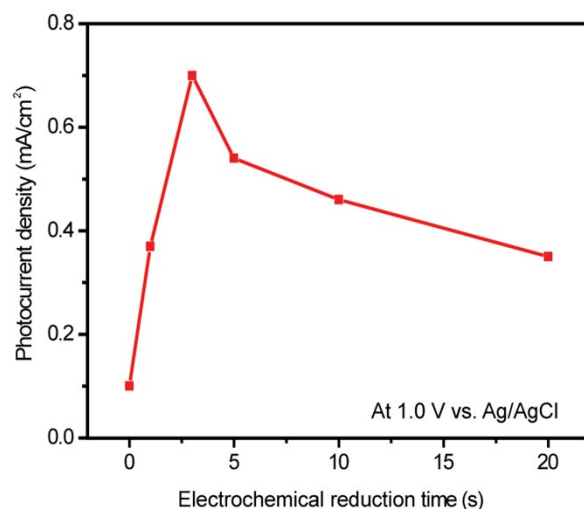

**Figure S2.** The photocurrent densities measured at  $1.0\text{ V}$  vs.  $\text{Ag}/\text{AgCl}$  for  $\text{WO}_3$

photoanodes prepared with different electrochemical reduction time.

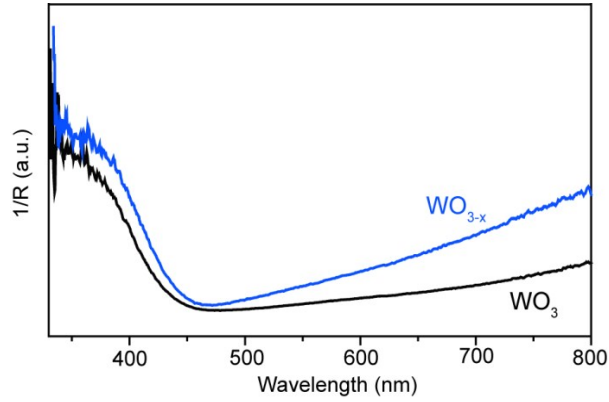

**Figure S3.** UV-visible diffusive reflectance spectra collected from WO<sub>3</sub> and WO<sub>3-x</sub> samples.

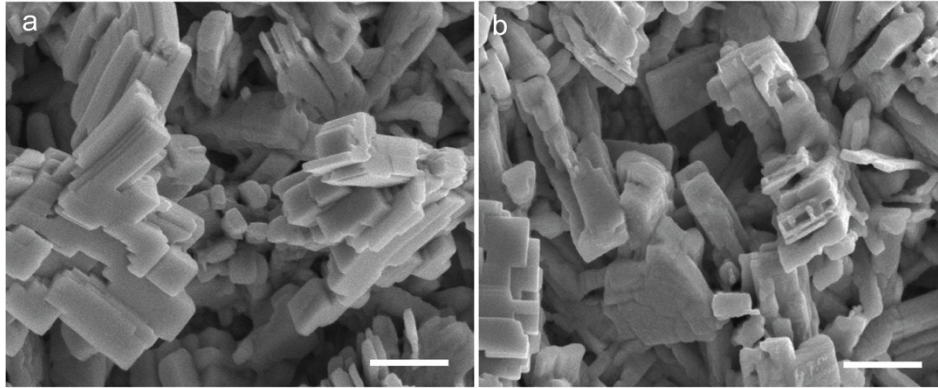

**Figure S4.** SEM images of WO<sub>3</sub> and WO<sub>3-x</sub> samples. Scale bars are 1 μm.



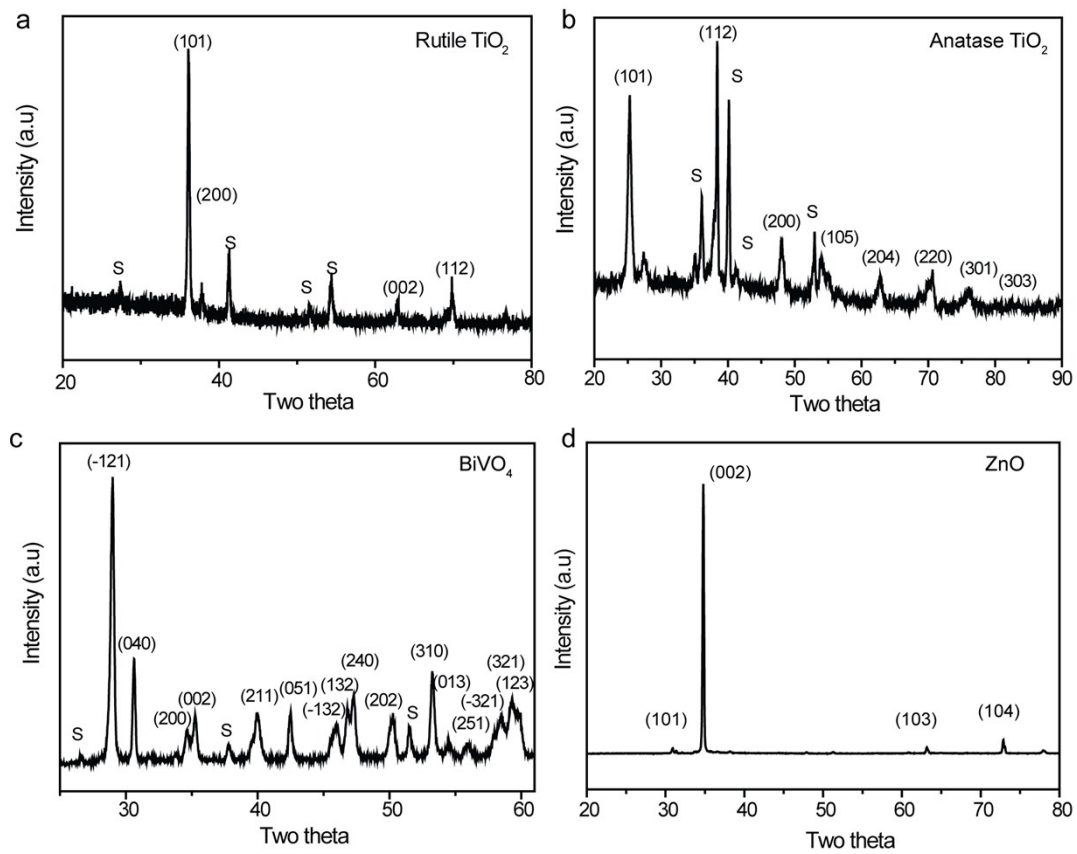

**Figure S5.** XRD spectra of the prepared rutile  $\text{TiO}_2$  nanowire arrays, anatase  $\text{TiO}_2$  nanowire arrays,  $\text{BiVO}_4$  nanoparticle thin film and ZnO nanowire arrays.

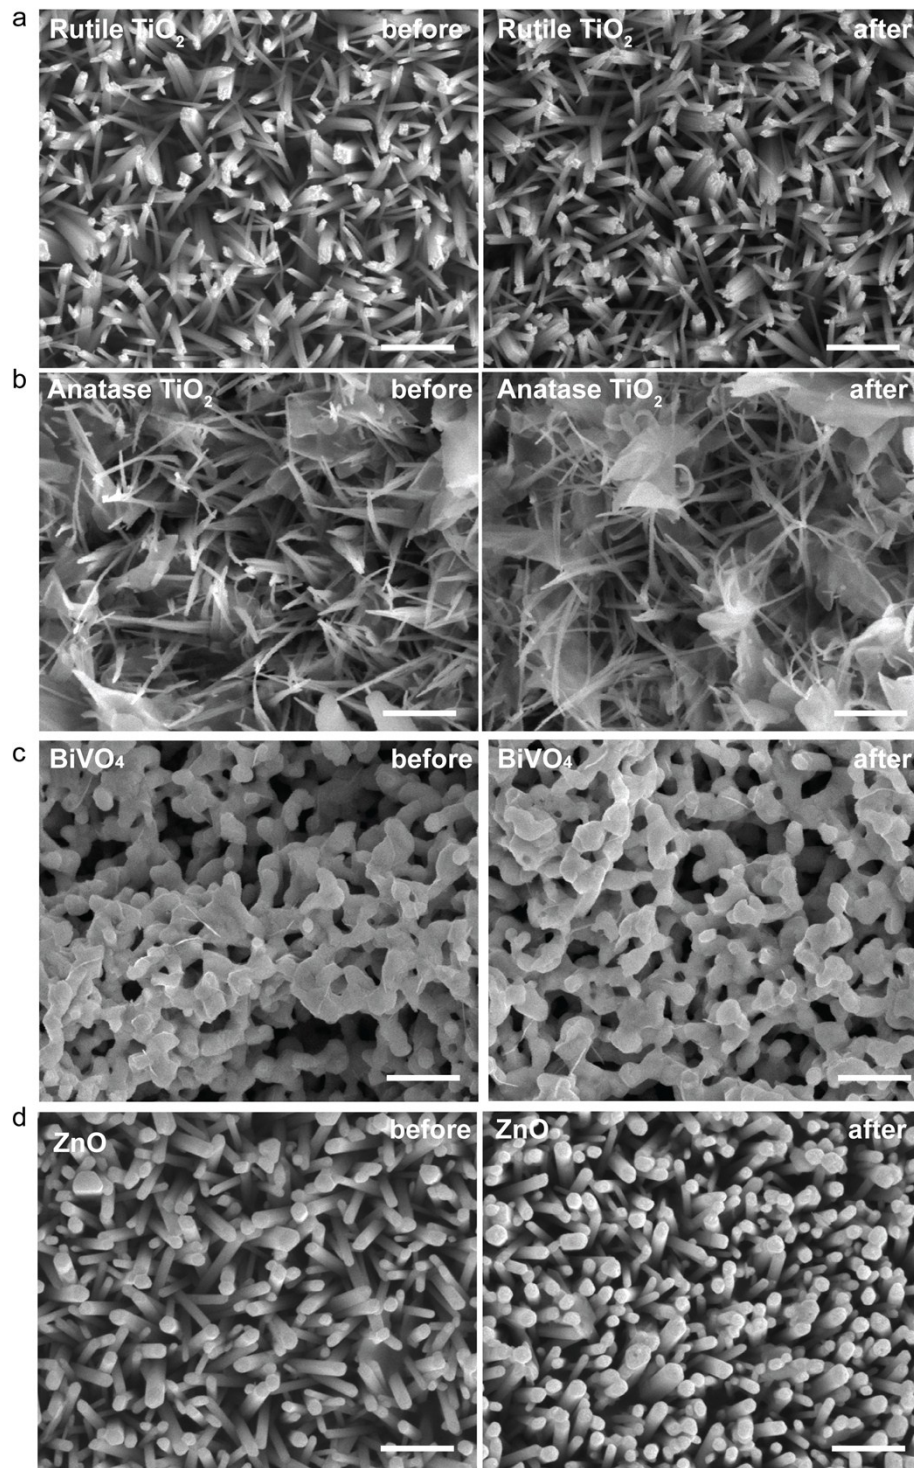

**Figure S6.** SEM images of rutile TiO<sub>2</sub> nanowire, anatase TiO<sub>2</sub> nanowires, BiVO<sub>4</sub> nanoparticles and ZnO nanowires before and after electrochemical treatment. Scale bars are 1  $\mu\text{m}$ .

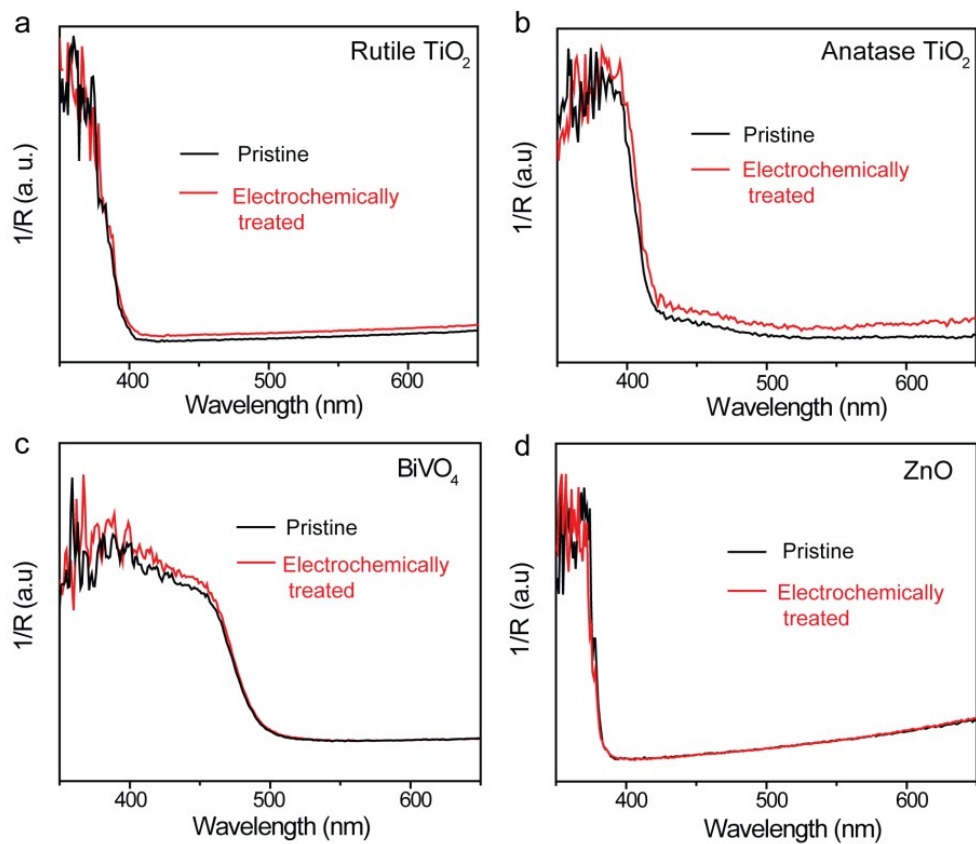

**Figure S7.** UV-vis diffusive reflectance spectra of rutile  $\text{TiO}_2$  nanowire, anatase  $\text{TiO}_2$  nanowires,  $\text{BiVO}_4$  nanoparticles and ZnO nanowires collected before and after electrochemical treatment.

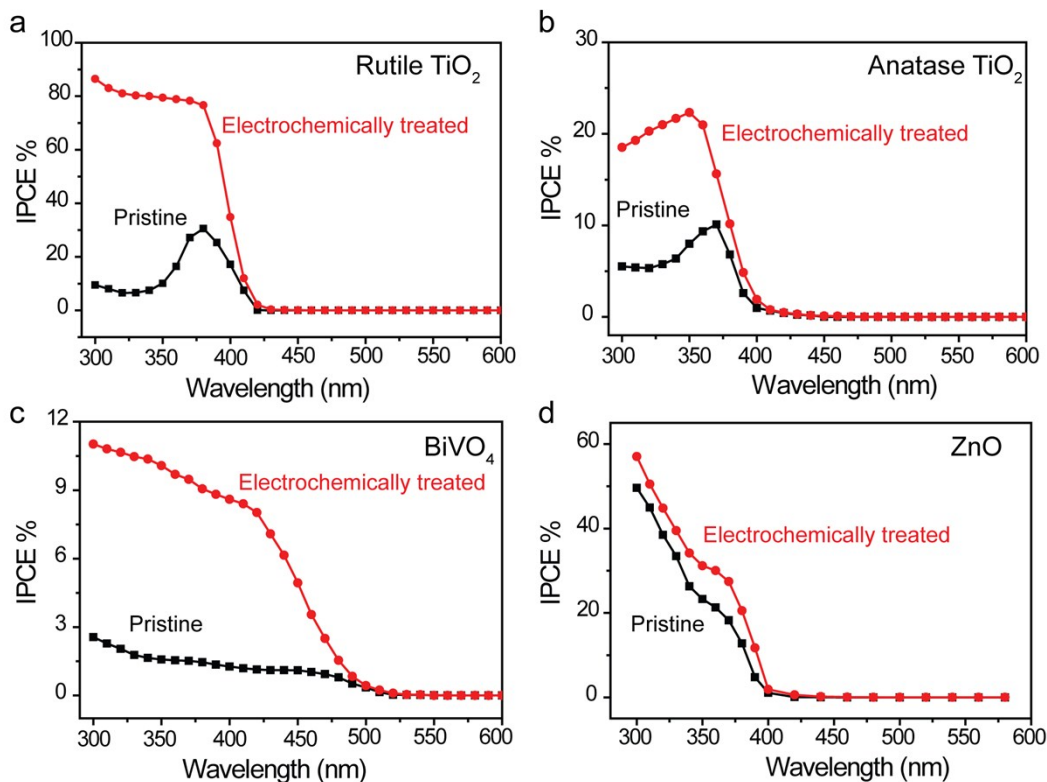

**Figure S8.** IPCE spectra of untreated and electrochemically treated rutile  $\text{TiO}_2$  nanowire, anatase  $\text{TiO}_2$  nanowires,  $\text{BiVO}_4$  nanoparticles and  $\text{ZnO}$  nanowires.

## References

1. G. Wang, H. Wang, Y. Ling, Y. Tang, X. Yang, R. C. Fitzmorris, C. Wang, J. Z. Zhang and Y. Li, *Nano Lett.*, 2011, 11, 3026.
2. G. Wang, Y. Ling, H. Wang, X. Yang, C. Wang, J. Z. Zhang and Y. Li, *Energy Environ. Sci.*, 2012, 5, 6180.
3. Y. Yang, Y. Ling, G. Wang and Y. Li, *Eur. J. Inorg. Chem.*, 2014, 2014, 760.
4. X. Yang, A. Wolcott, G. Wang, A. Sobo, R. C. Fitzmorris, F. Qian, J. Z. Zhang and Y. Li, *Nano Lett.* 2009, 9, 2331.
